# Supplementary material for: The Obesity-Related Dietary Pattern Is Associated with Higher Risk of Sleep Disorders: A Cross-Sectional Study from NHANES
Source: MDPI journal article supplement (doi:10.3390/nu14193987), 2022-09-26
Supplement: s1 [file s1]

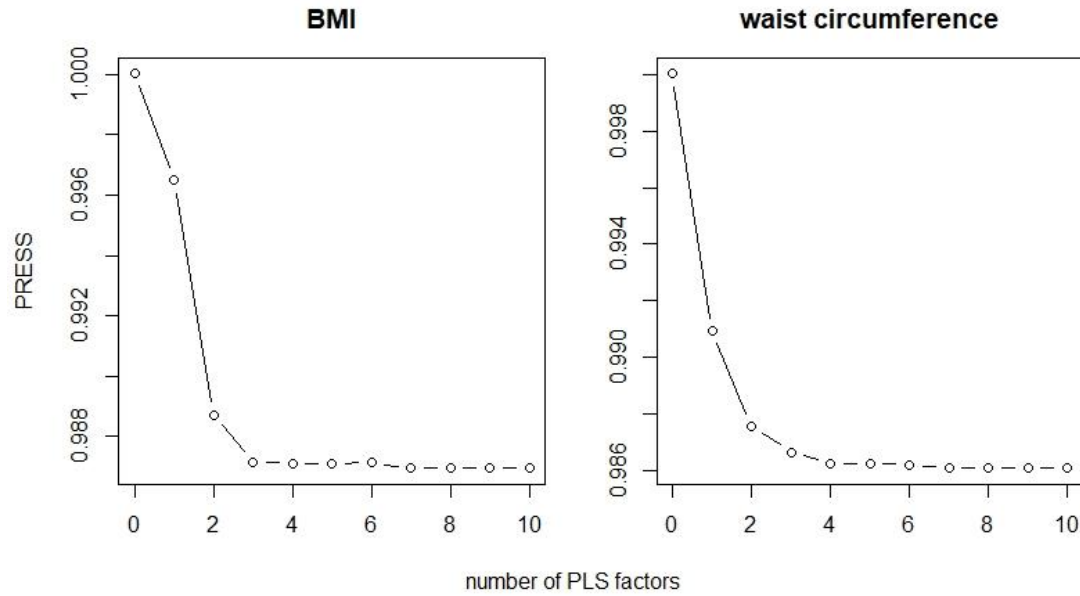

**Figure S1.** Predicted residual sum of squares (PRESS) of the different number of factors from PLS in BMI and waist circumference.

**Table S1.** Table of factor loadings and explained variance in food groups and responses in each dietary pattern <sup>1</sup>.

| Food Groups                                                                                                | “high fats, refined grains, and meat” pattern | “low whole grains, vegetables, and fruits” pattern |
|------------------------------------------------------------------------------------------------------------|-----------------------------------------------|----------------------------------------------------|
| Fruits                                                                                                     | <b>-0.22</b>                                  | <b>-0.23</b>                                       |
| Fruit juice                                                                                                | -0.07                                         | -0.16                                              |
| Dark Green Vegetables                                                                                      | <b>-0.21</b>                                  | -0.18                                              |
| Tomatoes                                                                                                   | 0.08                                          | <b>-0.27</b>                                       |
| Other red and orange vegetables (excludes, tomatoes)                                                       | -0.17                                         | <b>-0.22</b>                                       |
| Potatoes (white potatoes)                                                                                  | <b>0.31</b>                                   | -0.07                                              |
| Other starchy vegetables (excludes white potatoes)                                                         | -0.01                                         | -0.05                                              |
| Other vegetables                                                                                           | -0.05                                         | <b>-0.26</b>                                       |
| Beans and Peas                                                                                             | -0.01                                         | -0.18                                              |
| Whole Grains                                                                                               | -0.11                                         | <b>-0.30</b>                                       |
| Refined Grains                                                                                             | <b>0.30</b>                                   | <b>-0.28</b>                                       |
| Meat (beef, veal, pork, lamb, game)                                                                        | <b>0.28</b>                                   | -0.14                                              |
| Cured meat (frankfurters, sausage, corned beef, cured ham and luncheon meat made from beef, pork, poultry) | <b>0.39</b>                                   | 0.03                                               |
| Organ meat (from beef, veal, pork,                                                                         | 0.06                                          | 0.09                                               |

| Food Groups                                                                      | “high fats, refined grains,<br>and meat” pattern | “low whole grains,<br>vegetables, and fruits”<br>pattern |
|----------------------------------------------------------------------------------|--------------------------------------------------|----------------------------------------------------------|
| lamb, game, poultry)                                                             |                                                  |                                                          |
| Seafood                                                                          | -0.09                                            | -0.09                                                    |
| Poultry (chicken, turkey, other fowl)                                            | -0.01                                            | 0.11                                                     |
| Eggs                                                                             | <b>0.24</b>                                      | -0.03                                                    |
| Soybean products (excludes calcium<br>fortified soy milk and mature<br>soybeans) | -0.18                                            | <b>-0.23</b>                                             |
| Nuts and Seeds                                                                   | -0.06                                            | <b>-0.30</b>                                             |
| Milk (includes calcium fortified soy<br>milk)                                    | 0.08                                             | <b>-0.30</b>                                             |
| Yogurt                                                                           | <b>-0.22</b>                                     | -0.16                                                    |
| Cheese                                                                           | <b>0.30</b>                                      | -0.21                                                    |
| Oils                                                                             | 0.18                                             | <b>-0.37</b>                                             |
| Solid Fats                                                                       | <b>0.51</b>                                      | <b>-0.26</b>                                             |
| Added Sugars                                                                     | <b>0.27</b>                                      | -0.18                                                    |
| Alcoholic Drinks                                                                 | 0.08                                             | <b>-0.30</b>                                             |
| % explained variance in food groups                                              | 9.01                                             | 7.28                                                     |
| % explained variance in waist<br>circumference                                   | 1.91                                             | 0.74                                                     |
| % explained variance in BMI                                                      | 0.76                                             | 1.67                                                     |

<sup>1</sup> Absolute values of factor loadings  $\geq 0.20$  are in bold font.

**Table S2.** Characteristics of study participants by quartiles of dietary pattern scores in “high fats, refined grains, and meat” pattern <sup>1</sup>

| Characteristics                | “high fats, refined grains, and meat” pattern |             |             |             | <i>p</i> value <sup>4</sup> |
|--------------------------------|-----------------------------------------------|-------------|-------------|-------------|-----------------------------|
|                                | Q1                                            | Q2          | Q3          | Q4          |                             |
| <b>Age, %</b>                  |                                               |             |             |             | <0.001                      |
| 20-39                          | 1443 (30.9)                                   | 1613 (35.6) | 1834 (41.4) | 1934 (42.2) |                             |
| 40-59                          | 1771 (39.6)                                   | 1647 (36.6) | 1546 (35.9) | 1687 (40.4) |                             |
| 60+                            | 1988 (29.5)                                   | 1889 (27.8) | 1483 (22.6) | 1057 (17.4) |                             |
| <b>Age (year) <sup>2</sup></b> | 49.6 (16.7)                                   | 47.9 (17.3) | 45.6 (16.7) | 44.1 (15.4) | <0.001                      |
| <b>Female, %</b>               | 3528 (70.2)                                   | 3186 (63.8) | 2375 (49.1) | 1343 (27.0) | <0.001                      |
| <b>Race, %</b>                 |                                               |             |             |             | 0.003                       |
| MA                             | 737 (7.4)                                     | 853 (8.3)   | 781 (9.1)   | 616 (7.7)   |                             |
| OH                             | 539 (5.7)                                     | 454 (5.0)   | 363 (4.1)   | 291 (4.0)   |                             |
| NHW                            | 2178 (66.4)                                   | 2393 (69.5) | 2452 (70.8) | 2510 (72.8) |                             |
| NHB                            | 986 (9.9)                                     | 1077 (10.8) | 997 (11.1)  | 1057 (11.8) |                             |
| OR                             | 762 (10.5)                                    | 372 (6.4)   | 270 (4.9)   | 204 (3.7)   |                             |
| <b>Education level, %</b>      |                                               |             |             |             | <0.001                      |

| Characteristics                                | “high fats, refined grains, and meat” pattern |                |                |                | <i>p</i> value <sup>4</sup> |
|------------------------------------------------|-----------------------------------------------|----------------|----------------|----------------|-----------------------------|
|                                                | Q1                                            | Q2             | Q3             | Q4             |                             |
| ≤11th grade                                    | 1152 (13.6)                                   | 1274 (16.1)    | 1176 (16.6)    | 1106 (17.1)    | 0.001                       |
| High school grade or equivalent                | 903 (16.4)                                    | 1170 (22.9)    | 1209 (24.2)    | 1267 (26.8)    |                             |
| College or above                               | 3147 (70.1)                                   | 2705 (61.0)    | 2478 (59.2)    | 2305 (56.1)    |                             |
| <b>Poverty income ratio, %</b>                 |                                               |                |                |                |                             |
| ≤ 130%                                         | 1410 (18.7)                                   | 1600 (22.6)    | 1572 (22.4)    | 1509 (21.6)    | <0.001                      |
| 131% - 185%                                    | 661 (9.8)                                     | 703 (11.3)     | 614 (11.0)     | 578 (9.7)      |                             |
| ≥ 186%                                         | 3131 (71.5)                                   | 2846 (66.1)    | 2677 (66.6)    | 2591 (68.6)    |                             |
| <b>Unemployment, %</b>                         | 2402 (39.1)                                   | 2444 (42.4)    | 2068 (34.0)    | 1724 (29.9)    |                             |
| <b>Smoking, %</b>                              |                                               |                |                |                | <0.001                      |
| Current                                        | 576 (11.5)                                    | 927 (19.2)     | 1157 (24.3)    | 1354 (26.7)    |                             |
| Ever                                           | 1277 (24.3)                                   | 1313 (25.8)    | 1208 (23.7)    | 1208 (24.7)    |                             |
| Never                                          | 3349 (64.2)                                   | 2909 (55.0)    | 2498 (52.0)    | 2116 (48.6)    |                             |
| <b>Physical activity ≥ 600 MET-min/week, %</b> | 2063 (46.5)                                   | 1698 (39.2)    | 1493 (36.1)    | 1500 (34.0)    | <0.001                      |
| <b>Sleep duration (hours) <sup>2</sup></b>     | 7.0 (1.3)                                     | 6.9 (1.4)      | 6.9 (1.3)      | 6.8 (1.3)      | <0.001                      |
| <b>Energy intake (kcal/day) <sup>2,3</sup></b> | 1666.12 (595.7)                               | 1795.5 (590.7) | 2125.5 (605.3) | 2784.8 (724.6) | <0.001                      |
| <b>Waist circumference (cm) <sup>2</sup></b>   | 94.8 (15.3)                                   | 97.4 (15.8)    | 99.7 (16.5)    | 102.4 (17.0)   | <0.001                      |
| <b>BMI (kg/m<sup>2</sup>) <sup>2</sup></b>     | 27.7 (6.5)                                    | 28.5 (6.4)     | 29.2 (6.9)     | 29.8 (7.0)     | <0.001                      |

<sup>1</sup> All results were survey-weighted except for counts of categorical variables; <sup>2</sup> Mean (SD); <sup>3</sup> Energy intake was the average energy intake from two-day dietary recalls; <sup>4</sup> *p* value obtained from Kruskal-Wallis tests adjusted for sample weights. MA, Mexican American; OH, Other Hispanic; NHW, Non-Hispanic White; NHB, Non-Hispanic Black; OR, Other race; MET, metabolic equivalents; BMI, body mass index; Q, quartiles.

**Table S3.** Characteristics of study participants by quartiles of dietary pattern scores in “low whole grains, vegetables, and fruits” pattern <sup>1</sup>

| Characteristics                | “low whole grains, vegetables, and fruits” pattern |             |             |             | <i>p</i> value <sup>4</sup> |
|--------------------------------|----------------------------------------------------|-------------|-------------|-------------|-----------------------------|
|                                | Q1                                                 | Q2          | Q3          | Q4          |                             |
| <b>Age, %</b>                  |                                                    |             |             |             | <0.001                      |
| 20-39                          | 1692 (40.3)                                        | 1601 (36.5) | 1710 (35.5) | 1821 (37.7) | <0.001                      |
| 40-59                          | 1546 (40.4)                                        | 1575 (38.3) | 1713 (37.6) | 1817 (36.2) |                             |
| 60+                            | 1075 (19.3)                                        | 1487 (25.1) | 1754 (26.9) | 2101 (26.1) |                             |
| <b>Age (year) <sup>2</sup></b> | 45.3 (15.6)                                        | 47.3 (16.6) | 47.7 (17.0) | 46.9 (17.3) |                             |
| <b>Female, %</b>               | 1528 (36.9)                                        | 2264 (48.6) | 3012 (59.7) | 3628 (64.9) | <0.001                      |
| <b>Race, %</b>                 |                                                    |             |             |             | <0.001                      |
| MA                             | 665 (7.8)                                          | 733 (8.3)   | 797 (8.7)   | 792 (7.7)   | <0.001                      |
| OH                             | 273 (3.3)                                          | 368 (4.3)   | 473 (5.3)   | 533 (6.0)   |                             |
| NHW                            | 2415 (77.2)                                        | 2370 (72.2) | 2440 (68.5) | 2308 (61.6) |                             |
| NHB                            | 537 (5.5)                                          | 806 (8.8)   | 1043 (10.8) | 1731 (18.5) |                             |

| Characteristics                                | “low whole grains, vegetables, and fruits” pattern |                |                |                | <i>p</i> value <sup>4</sup> |
|------------------------------------------------|----------------------------------------------------|----------------|----------------|----------------|-----------------------------|
|                                                | Q1                                                 | Q2             | Q3             | Q4             |                             |
| OR                                             | 423 (6.3)                                          | 386 (6.4)      | 424 (6.7)      | 375 (6.2)      |                             |
| <b>Education level, %</b>                      |                                                    |                |                |                | <0.001                      |
| ≤11th grade                                    | 707 (9.6)                                          | 987 (15.1)     | 1257 (16.1)    | 1757 (22.5)    |                             |
| High school grade or equivalent                | 835 (17.8)                                         | 963 (19.8)     | 1221 (25.1)    | 1530 (27.6)    |                             |
| College or above                               | 2771 (72.6)                                        | 2713 (65.1)    | 2699 (58.8)    | 2452 (49.9)    |                             |
| <b>Poverty income ratio, %</b>                 |                                                    |                |                |                | <0.001                      |
| ≤ 130%                                         | 1090 (16.9)                                        | 1263 (18.3)    | 1545 (20.4)    | 2193 (29.7)    |                             |
| 131% - 185%                                    | 449 (8.3)                                          | 546 (9.6)      | 684 (11.1)     | 877 (12.9)     |                             |
| ≥ 186%                                         | 2774 (74.8)                                        | 2854 (72.1)    | 2948 (68.5)    | 2669 (57.4)    |                             |
| <b>Unemployment, %</b>                         | 1485 (28.6)                                        | 1879 (34.1)    | 2370 (38.3)    | 2904 (44.4)    | <0.001                      |
| <b>Smoking, %</b>                              |                                                    |                |                |                | 0.045                       |
| Current                                        | 806 (17.6)                                         | 844 (19.5)     | 1031 (19.7)    | 1333 (24.9)    |                             |
| Ever                                           | 1163 (26.9)                                        | 1245 (26.2)    | 1300 (24.7)    | 1298 (20.7)    |                             |
| Never                                          | 2344 (55.5)                                        | 2574 (54.3)    | 2846 (55.6)    | 3108 (54.4)    |                             |
| <b>Physical activity ≥ 600 MET-min/week, %</b> | 1965 (50.4)                                        | 1684 (39.7)    | 1574 (35.2)    | 1531 (30.6)    | <0.001                      |
| <b>Sleep duration (hours) <sup>2</sup></b>     | 7.0 (1.20)                                         | 7.0 (1.30)     | 6.9 (1.32)     | 6.8 (1.51)     | <0.001                      |
| <b>Energy intake (kcal/day) <sup>2,3</sup></b> | 2811.3 (766.7)                                     | 2221.9 (565.0) | 1857.5 (484.6) | 1480.6 (489.8) | <0.001                      |
| <b>Waist circumference (cm) <sup>2</sup></b>   | 96.64 (15.5)                                       | 98.43 (16.2)   | 98.6 (16.2)    | 100.6 (17.4)   | <0.001                      |
| <b>BMI (kg/m<sup>2</sup>) <sup>2</sup></b>     | 27.6 (6.0)                                         | 28.6 (6.4)     | 29.0 (6.7)     | 30.1 (7.5)     | <0.001                      |

<sup>1</sup> All results were survey-weighted except for counts of categorical variables; <sup>2</sup> Mean (SD); <sup>3</sup> Energy intake was the average energy intake from two-day dietary recalls; <sup>4</sup> *p* value obtained from Kruskal-Wallis tests adjusted for sample weights. MA, Mexican American; OH, Other Hispanic; NHW, Non-Hispanic White; NHB, Non-Hispanic Black; OR, Other race; MET, metabolic equivalents; BMI, body mass index; Q, quartiles.

**Table S4.** Factors related to anthropometric characteristics of study participants by quartiles of dietary factor scores in two dietary patterns <sup>1,2</sup>.

|                                                      | Q1          | Q2          | Q3          | Q4          | <i>p</i> value <sup>3</sup> |
|------------------------------------------------------|-------------|-------------|-------------|-------------|-----------------------------|
| <b>“high fats, refined grains, and meat” pattern</b> |             |             |             |             |                             |
| <b>Tried to lose weight in past year, %</b>          | 1863 (45.1) | 1781 (43.4) | 1472 (37.4) | 1232 (32.4) | <0.001                      |
| <b>Consider your weight, %</b>                       |             |             |             |             | <0.001                      |
| Overweight                                           | 2811 (54.2) | 2950 (58.2) | 2713 (57.4) | 2529 (57.4) |                             |
| Underweight                                          | 212 (3.9)   | 217 (3.4)   | 217 (4.1)   | 307 (5.7)   |                             |
| About the right weight                               | 2168 (42.0) | 1966 (38.3) | 1928 (38.4) | 1833 (36.9) |                             |
| <b>Like to weigh more, less or same, %</b>           |             |             |             |             | <0.001                      |
| More                                                 | 240 (3.9)   | 271 (4.1)   | 313 (6.2)   | 503 (9.6)   |                             |
| Less                                                 | 3380 (68.1) | 3348 (68.1) | 3106 (67.5) | 2807 (64.3) |                             |

|                                                           | Q1          | Q2          | Q3          | Q4          | <i>p</i> value <sup>3</sup> |
|-----------------------------------------------------------|-------------|-------------|-------------|-------------|-----------------------------|
| Stay about the same                                       | 1577 (28.0) | 1522 (27.9) | 1437 (26.3) | 1364 (26.1) |                             |
| <b>Ate less to lose weight, %</b>                         | 1625 (34.1) | 1529 (32.1) | 1272 (27.4) | 1102 (24.6) | <0.001                      |
| <b>“low whole grains, vegetables, and fruits” pattern</b> |             |             |             |             |                             |
| <b>Tried to lose weight in past year, %</b>               | 1242 (36.0) | 1465 (38.1) | 1754 (42.6) | 1887 (41.6) | <0.001                      |
| <b>Consider your weight, %</b>                            |             |             |             |             | <0.001                      |
| Overweight                                                | 2024 (48.3) | 2575 (57.0) | 3016 (60.2) | 3388 (61.7) |                             |
| Underweight                                               | 232 (4.7)   | 199 (4.2)   | 242 (4.1)   | 280 (4.1)   |                             |
| About the right weight                                    | 2051 (47.0) | 1880 (38.8) | 1908 (35.6) | 2056 (34.2) |                             |
| <b>Like to weigh more, less or same, %</b>                |             |             |             |             | <0.001                      |
| More                                                      | 375 (8.0)   | 288 (5.8)   | 326 (5.5)   | 338 (4.4)   |                             |
| Less                                                      | 2439 (59.7) | 2982 (67.8) | 3424 (69.6) | 3796 (70.9) |                             |
| Stay about the same                                       | 1499 (32.4) | 1385 (26.4) | 1421 (24.8) | 1595 (24.6) |                             |
| <b>Ate less to lose weight, %</b>                         | 1059 (26.8) | 1236 (27.7) | 1521 (32.1) | 1712 (31.6) | <0.001                      |

<sup>1</sup> All results are survey-weighted except for sample counts; <sup>2</sup> Missing values were not included; <sup>3</sup> *p* value obtained from Kruskal-Wallis tests adjusted for sample weights. Q, quartiles.

**Table S5.** Odds ratios of sleep disorders and corresponding 95% CIs according to quartiles of dietary pattern scores from partial least square adjusted for the reporting groups <sup>1</sup>.

|                                                    | Quartile of Dietary Pattern Scores |                     |                     |                       |                    |
|----------------------------------------------------|------------------------------------|---------------------|---------------------|-----------------------|--------------------|
|                                                    | Q1                                 | Q2                  | Q3                  | Q4                    | <i>p</i> for Trend |
| “high fats, refined grains, and meat” pattern      |                                    |                     |                     |                       |                    |
| Sleep disorder/Total                               | 367/5202                           | 433/5149            | 412/4863            | 459/4678              |                    |
| Model 1                                            | 1.0(Ref.)                          | 1.26 (1.00,1.60)    | 1.23 (0.99,1.53)    | 1.66 (1.31,2.11) ***  | <0.001             |
| Model 2                                            | 1.0(Ref.)                          | 1.31 (1.04, 1.67) * | 1.31 (1.05, 1.62) * | 1.69 (1.32, 2.16) *** | <0.001             |
| Model 3                                            | 1.0(Ref.)                          | 1.21 (0.94, 1.54)   | 1.17 (0.95, 1.45)   | 1.42 (1.10, 1.85) *   | 0.013              |
| “low whole grains, vegetables, and fruits” pattern |                                    |                     |                     |                       |                    |
| Sleep disorder/Total                               | 323/4313                           | 360/4663            | 454/5177            | 534/5739              |                    |
| Model 1                                            | 1.0(Ref.)                          | 0.94 (0.77,1.15)    | 1.06 (0.85,1.32)    | 0.99 (0.82,1.21)      | 0.788              |
| Model 2                                            | 1.0(Ref.)                          | 1.06 (0.86, 1.31)   | 1.30 (1.02, 1.65) * | 1.30 (1.02, 1.64) *   | 0.019              |
| Model 3                                            | 1.0(Ref.)                          | 1.01 (0.81, 1.25)   | 1.20 (0.93, 1.56)   | 1.12 (0.87, 1.43)     | 0.239              |

<sup>1</sup> All results were survey-weighted except for sample counts. \**p*<0.05; \*\**p*<0.01; \*\*\**p*<0.001. CI, confidence interval; Q, quartiles. Model 1: adjusted for the reporting groups; Model 2: Model 1 additionally adjusted for age, gender, and energy intake; Model 3: Model 2 additionally adjusted for race, education, poverty income ratio, employment status, smoking, and physical activity.

**Table S6.** Coefficients of sleep duration and corresponding 95% CIs according to quartiles of dietary pattern scores from partial least square adjusted for the reporting groups <sup>1</sup>.

|                                                    | Quartile of Dietary Pattern Scores |                         |                          |                          | <i>p</i> for Trend |
|----------------------------------------------------|------------------------------------|-------------------------|--------------------------|--------------------------|--------------------|
|                                                    | Q1                                 | Q2                      | Q3                       | Q4                       |                    |
| “high fats, refined grains, and meat” pattern      |                                    |                         |                          |                          |                    |
| Model 1                                            | 1.0(Ref.)                          | -0.05 (-0.13, 0.03)     | -0.10 (-0.17, -0.03) **  | -0.26 (-0.34, -0.18) *** | <0.001             |
| Model 2                                            | 1.0(Ref.)                          | -0.05 (-0.13, 0.03)     | -0.09 (-0.17, -0.02) *   | -0.24 (-0.32, -0.15) *** | <0.001             |
| Model 3                                            | 1.0(Ref.)                          | -0.03 (-0.11, 0.05)     | -0.05 (-0.13, 0.03)      | -0.18 (-0.27, -0.08) *** | <0.001             |
| “low whole grains, vegetables, and fruits” pattern |                                    |                         |                          |                          |                    |
| Model 1                                            | 1.0(Ref.)                          | -0.04 (-0.11, 0.03)     | -0.12 (-0.19, -0.05) **  | -0.22 (-0.31, -0.13) *** | <0.001             |
| Model 2                                            | 1.0(Ref.)                          | -0.12 (-0.19, -0.05) ** | -0.25 (-0.32, -0.17) *** | -0.39 (-0.49, -0.28) *** | <0.001             |
| Model 3                                            | 1.0(Ref.)                          | -0.07 (-0.13, 0)        | -0.16 (-0.25, -0.08) *** | -0.25 (-0.35, -0.14) *** | <0.001             |

<sup>1</sup> All results were survey-weighted except for sample counts. \**p*<0.05; \*\**p*<0.01; \*\*\**p*<0.001. CI, confidence interval; Q, quartiles. Model 1: Crude model additionally adjusted for the reporting groups; Model 2: Model 1 additionally adjusted for age, gender, and energy intake; Model 3: Model 2 additionally adjusted for race, education, poverty income ratio, employment status, smoking, and physical activity;
